# Supplementary material for: Molecular Characterization, Expression, Evolutionary Selection, and Biological Activity Analysis of CD68 Gene from Megalobrama amblycephala
Source: MDPI journal article supplement (doi:10.3390/ijms232113133), 2022-10-28
Supplement: s1 [file s1]

**Supplemental Table S1.** CD68 Sequences used for phylogenetic analysis.

| Species Names                       | Order              | Family         | Accession Number |
|-------------------------------------|--------------------|----------------|------------------|
| <i>Megalobrama amblycephala</i>     | Cypriniformes      | Cyprinidae     | KY798319.1       |
| <i>Danio rerio</i>                  | Cypriniformes      | Cyprinidae     | XM_021471872.1   |
| <i>Pimephales promelas</i>          | Cypriniformes      | Cyprinidae     | XM_039659499.1   |
| <i>Carassius auratus</i>            | Cypriniformes      | Cyprinidae     | XM_026216673.1   |
| <i>Cyprinus carpio</i>              | Cypriniformes      | Cyprinidae     | XM_019094400.1   |
| <i>Sinocyclocheilus anshuiensis</i> | Cypriniformes      | Cyprinidae     | XM_016479579.1   |
| <i>Sinocyclocheilus grahami</i>     | Cypriniformes      | Cyprinidae     | XM_016229627.1   |
| <i>Sinocyclocheilus rhinoceros</i>  | Cypriniformes      | Cyprinidae     | XM_016543127.1   |
| <i>Fundulus heteroclitus</i>        | Cyprinodontiformes | Fundulidae     | XM_036146112.1   |
| <i>Aphyosemion striatum</i>         | Cyprinodontiformes | Aplocheilidae  | HADW01006630.1   |
| <i>Nothobranchius furzeri</i>       | Cyprinodontiformes | Aplocheilidae  | HAEJ01012303.1   |
| <i>Nothobranchius kadleci</i>       | Cyprinodontiformes | Aplocheilidae  | HADZ01001372.1   |
| <i>Nothobranchius korthausae</i>    | Cyprinodontiformes | Aplocheilidae  | HAEB01016763.1   |
| <i>Nothobranchius kuhntae</i>       | Cyprinodontiformes | Aplocheilidae  | HAED01005512.1   |
| <i>Nothobranchius pienaar</i>       | Cyprinodontiformes | Aplocheilidae  | HAEF01004587.1   |
| <i>Nothobranchius rachovii</i>      | Cyprinodontiformes | Aplocheilidae  | HAEH01017065.1   |
| <i>Perca flavescens</i>             | Perciformes        | Percidae       | XM_028564140.1   |
| <i>Etheostoma spectabile</i>        | Perciformes        | Percidae       | XM_032544753.1   |
| <i>Sebastes umbrosus</i>            | Perciformes        | Sebastidae     | XM_037758134.1   |
| <i>Oncorhynchus kisutch</i>         | Salmoniformes      | Salmonidae     | XM_020491718.2   |
| <i>Oncorhynchus mykiss</i>          | Salmoniformes      | Salmonidae     | XM_021578316.2   |
| <i>Oncorhynchus nerka</i>           | Salmoniformes      | Salmonidae     | XM_029646163.1   |
| <i>Oncorhynchus tshawytscha</i>     | Salmoniformes      | Salmonidae     | XM_024405126.1   |
| <i>Pygocentrus nattereri</i>        | Characiformes      | Serrasalminae  | XM_017718831.2   |
| <i>Colossoma macropomum</i>         | Characiformes      | Serrasalminae  | XM_036596639.1   |
| <i>Ictalurus punctatus</i>          | Siluriformes       | Ictaluridae    | XM_017472374.1   |
| <i>Tachysurus fulvidraco</i>        | Siluriformes       | Bagridae       | XM_027169456.1   |
| <i>Seriola dumerili</i>             | Carangiformes      | Carangidae     | XM_022747801.1   |
| <i>Monopterus albus</i>             | Synbranchiformes   | Synbranchidae  | XM_020594973.1   |
| <i>Scophthalmus maximus</i>         | Pleuronectiformes  | Scophthalmidae | XM_035623117.1   |
| <i>Homo sapiens</i>                 | Primates           | Hominidae      | NM_001040059.2   |
| <i>Mus musculus</i>                 | Rodentia           | Eumuroidea     | NM_001291058.1   |

**Supplemental Table S2.** Branch-site model A [58].

| Site Class | Proportion                          | Background $\omega$ | Foreground $\omega$ |
|------------|-------------------------------------|---------------------|---------------------|
| 0          | $p_0$                               | $0 < \omega_0 < 1$  | $0 < \omega_0 < 1$  |
| 1          | $p_1$                               | $\omega_1 = 1$      | $\omega_1 = 1$      |
| 2a         | $(1 - p_0 - p_1) p_0 / (p_0 + p_1)$ | $0 < \omega_0 < 1$  | $\omega_2 \geq 1$   |
| 2b         | $(1 - p_0 - p_1) p_1 / (p_0 + p_1)$ | $\omega_1 = 1$      | $\omega_2 \geq 1$   |
